# Supplementary material for: ALOX5 exhibits anti-tumor and drug-sensitizing effects in MLL-rearranged leukemia
Source: PubMed Central journal article supplement (PMC5431828; doi:10.1038/s41598-017-01913-y), 2017-05-12
Supplement: 41598_2017_1913_MOESM1_ESM.pdf [file 41598_2017_1913_MOESM1_ESM.pdf]

## **Supplementary Information**

### ***ALOX5* exhibits anti-tumor and drug-sensitizing effects in *MLL*-rearranged leukemia**

Yungui Wang, Jennifer R. Skibbe, Chao Hu, Lei Dong, Kyle Ferchen, Rui Su, Chenying Li, Hao Huang, Hengyou Weng, Huilin Huang, Xi Qin, Jie Jin, Jianjun Chen, Xi Jiang

### **Inventory of Supplementary Information**

Supplementary Figures 1-3 and Figure Legends (Page 2-4)

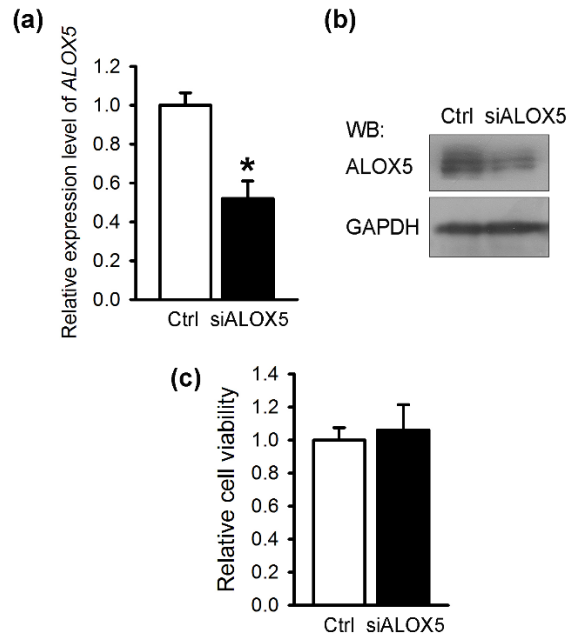

**Supplemental Figure 1. Knockdown of *ALOX5* shows no significant effect on AML cell viability.** (a) MONOMAC-6 cells were transfected with control siRNA or *ALOX5* siRNA. qPCR was performed to detect the expression level of *ALOX5* 48 hrs post transfection. (b) Inhibitory effect of *ALOX5* siRNA in MONOMAC-6 cells on *ALOX5* protein level. (c) Effects of *ALOX5* siRNA on the viability of MONOMAC-6 cells. Cell viability was tested 48 hrs post transfection. \* $P < 0.05$ , two-tailed *t*-test.

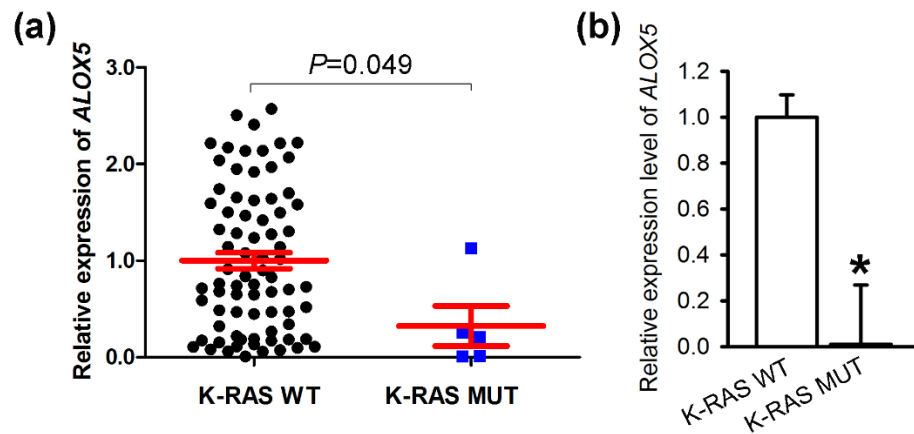

**Supplemental Figure 2. *K-RAS* mutations repress *ALOX5* level in AML.** (a) Comparison of *ALOX5* expression between AML with wild-type *K-RAS* and *K-RAS* mutations (*K-RAS* MUT) in GSE62190. (b) Expression levels of *ALOX5* in human  $CD34^+$ -derived *MLL-AF9* cell lines with or without *K-RAS* mutation. \* $P < 0.05$ , two-tailed *t*-test.

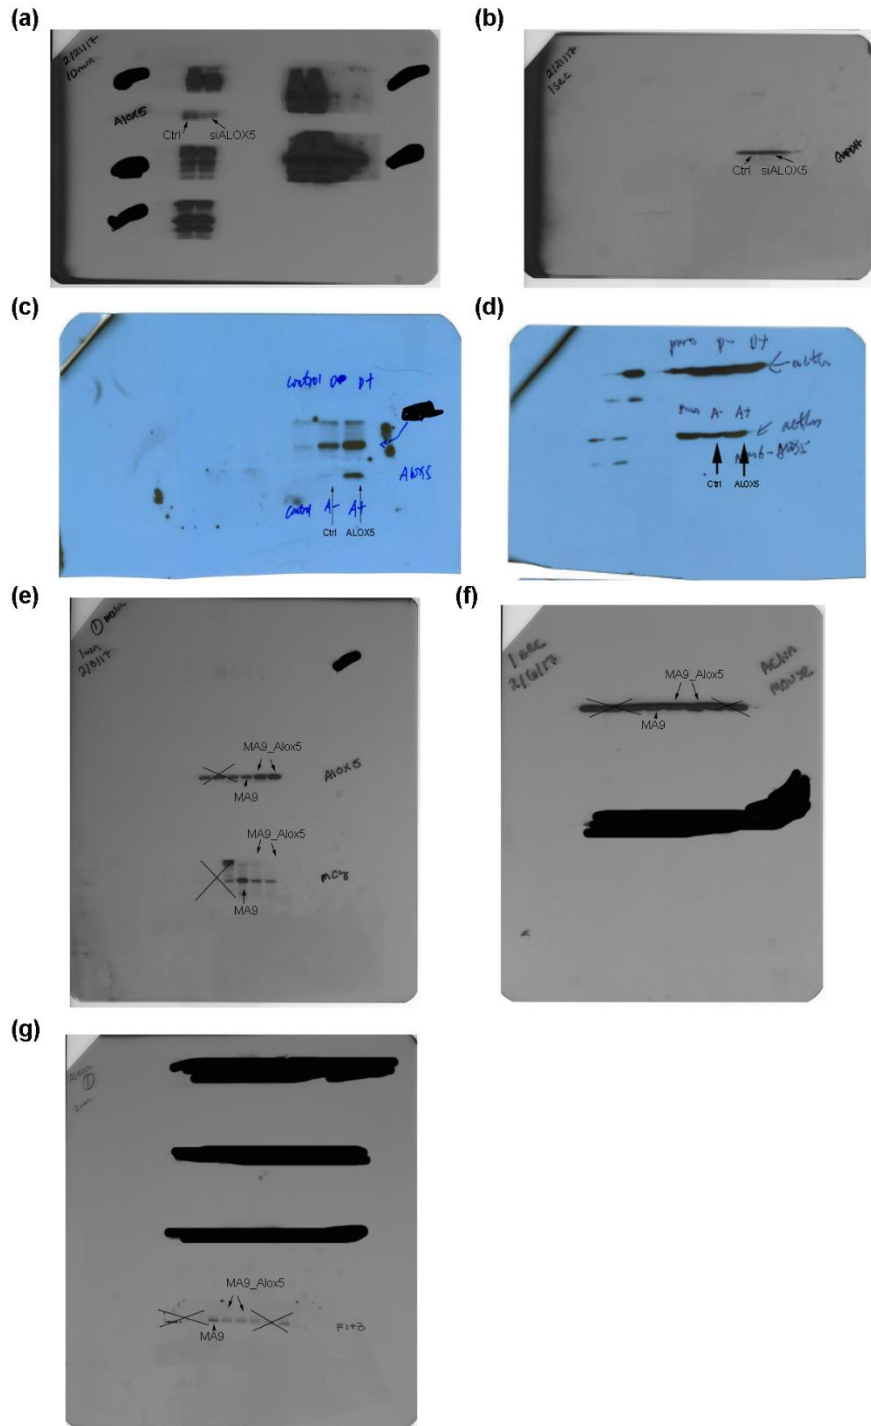

**Supplementary Figure 3. Original scans of Western blotting results.**
